# Supplementary material for: Development of a Personalized Mobile Mental Health Intervention for Workplace Cyberbullying Among Health Practitioners: Protocol for a Mixed Methods Study
Source: PubMed Central journal article supplement (PMC7718091; doi:10.2196/23112), 2020-11-20
Supplement: resprot_v9i11e23112_app1.pdf [file resprot_v9i11e23112_app1.pdf]

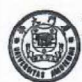

XIAMEN UNIVERSITY MALAYSIA

廈門大學 馬來西亞分校

**Xiamen University Malaysia Research Fund (XMUMRF)  
Evaluation Form**

|      |      |       |   |
|------|------|-------|---|
| Year | 2020 | Cycle | 6 |
|------|------|-------|---|

| Name of evaluator                  |                                    |                                                                                                                   |     |                                                        |
|------------------------------------|------------------------------------|-------------------------------------------------------------------------------------------------------------------|-----|--------------------------------------------------------|
| Title/designation                  |                                    |                                                                                                                   |     |                                                        |
| Department/Faculty/University      |                                    |                                                                                                                   |     |                                                        |
| Home/Office address                |                                    |                                                                                                                   |     |                                                        |
| Mobile phone no                    |                                    |                                                                                                                   |     |                                                        |
| Email                              |                                    |                                                                                                                   |     |                                                        |
| Principal Investigator (PI)        |                                    | Dr. Aslam Muhammad Shahza                                                                                         |     |                                                        |
| Title of proposed research project |                                    | Development of Personalized Mobile Mental Health Intervention for Workplace Cyberbullying on Health practitioners |     |                                                        |
| Evaluation                         |                                    |                                                                                                                   |     |                                                        |
| 1                                  | Research project team              |                                                                                                                   | Y/N | Comment                                                |
|                                    | PI                                 | Appropriate qualifications to conduct and complete the proposed research                                          | Y   | PI has the foundation of previous work.                |
|                                    | Co-researchers (if applicable)     | Appropriate qualifications                                                                                        | Y   | Experts in Chinese medicine                            |
| 2                                  | Title of proposed research project |                                                                                                                   | Y   | The title appropriately explains the research content. |
|                                    |                                    | Appropriate for the proposed research activities, etc                                                             |     |                                                        |
|                                    |                                    | Not appropriate, too general, etc                                                                                 |     |                                                        |
| 3                                  | Research area/field                | Appropriate or not                                                                                                | Y   | Mental Health                                          |
| 4                                  | Duration                           | Appropriate or not                                                                                                | Y   | Suitable                                               |
| 5                                  | Abstract                           | Well written, informative, etc                                                                                    | Y   | Concise and accurate                                   |
|                                    |                                    | Poor, recommend to rewrite, etc                                                                                   |     |                                                        |
| 6                                  | Objective(s)                       | Clearly written, achievable, etc                                                                                  | Y   | cyberbullying in public and private hospitals          |
|                                    |                                    | Ambiguous, etc                                                                                                    |     |                                                        |
|                                    |                                    | Too ambitious, etc                                                                                                |     |                                                        |

|    |                                                                                                                               |                                                                                                                                                                                                                                                                                                                                                                                                                                                                                                                     |   |                                                              |
|----|-------------------------------------------------------------------------------------------------------------------------------|---------------------------------------------------------------------------------------------------------------------------------------------------------------------------------------------------------------------------------------------------------------------------------------------------------------------------------------------------------------------------------------------------------------------------------------------------------------------------------------------------------------------|---|--------------------------------------------------------------|
| 7  | Literature review/<br>Research background                                                                                     | Concise, acceptable with some relevant key references, etc                                                                                                                                                                                                                                                                                                                                                                                                                                                          | N | The relevant key references and research background are less |
|    |                                                                                                                               | Irrelevant, insufficient, etc                                                                                                                                                                                                                                                                                                                                                                                                                                                                                       |   |                                                              |
| 8  | Research methodology                                                                                                          | Good, using existing methods, etc                                                                                                                                                                                                                                                                                                                                                                                                                                                                                   |   |                                                              |
|    |                                                                                                                               | Good, developing new methods, etc                                                                                                                                                                                                                                                                                                                                                                                                                                                                                   | Y | Be going to develop new methods                              |
|    |                                                                                                                               | Insufficient details, etc                                                                                                                                                                                                                                                                                                                                                                                                                                                                                           |   |                                                              |
| 9  | Flowchart                                                                                                                     | Lucid, informative, etc                                                                                                                                                                                                                                                                                                                                                                                                                                                                                             | N | No flowchart                                                 |
| 10 | Expected results or benefits                                                                                                  | Reasonable, achievable, etc                                                                                                                                                                                                                                                                                                                                                                                                                                                                                         | Y | Reasonable                                                   |
| 11 | Benefits of the proposed research to XMUM, the economy, and the society                                                       | Reasonable, achievable, etc                                                                                                                                                                                                                                                                                                                                                                                                                                                                                         | Y | Solve mental issues.                                         |
| 12 | Comment on the status of similar or related research in Malaysia and abroad; how is the proposed research different from them | Well written, informative, etc                                                                                                                                                                                                                                                                                                                                                                                                                                                                                      | N | Nil                                                          |
| 13 | Project schedule/Gantt chart                                                                                                  | Reasonable, achievable, etc                                                                                                                                                                                                                                                                                                                                                                                                                                                                                         | Y | perfect                                                      |
| 14 | Project milestones                                                                                                            | Lucid, achievable, etc                                                                                                                                                                                                                                                                                                                                                                                                                                                                                              | Y | Clearly and completely                                       |
| 15 | Budget                                                                                                                        |                                                                                                                                                                                                                                                                                                                                                                                                                                                                                                                     |   |                                                              |
|    | Allowance for assistant                                                                                                       | Reasonable, comply with Guidelines                                                                                                                                                                                                                                                                                                                                                                                                                                                                                  |   | Not mentioned                                                |
|    | Travel and subsistence                                                                                                        | Reasonable, comply with Guidelines                                                                                                                                                                                                                                                                                                                                                                                                                                                                                  |   | Not mentioned                                                |
|    | Equipment and accessories                                                                                                     | Reasonable, comply with Guidelines                                                                                                                                                                                                                                                                                                                                                                                                                                                                                  |   | Not mentioned                                                |
|    | Research materials                                                                                                            | Reasonable, comply with Guidelines                                                                                                                                                                                                                                                                                                                                                                                                                                                                                  | Y | Prototype Development, Statistical tool purchase             |
|    | Rental                                                                                                                        | Reasonable, comply with Guidelines                                                                                                                                                                                                                                                                                                                                                                                                                                                                                  |   | Not mentioned                                                |
|    | Minor repair                                                                                                                  | Reasonable, comply with Guidelines                                                                                                                                                                                                                                                                                                                                                                                                                                                                                  |   | Not mentioned                                                |
|    | Special service                                                                                                               | Reasonable, comply with Guidelines                                                                                                                                                                                                                                                                                                                                                                                                                                                                                  | Y | Research Publications                                        |
| 16 | Overall assessment of the proposal                                                                                            | In terms of quality, novelty, significance, impact, objective, scope, problem statement, literature review, references, methodology, statistics, timeliness, milestone, deliverable, cost effectiveness, budget, flowchart, project risks (technical, budget, timeline), suitability or competence of the PI, etc (strong, sound, good, poor, high, low, medium, minor weakness, major weakness, scientifically or technically flawed, all or partial assessment criteria met, etc)                                 |   |                                                              |
|    |                                                                                                                               | <p>Please summarise here:</p> <p>The research is based on a sufficient basis, the research content is innovative, the design idea is reasonable, the research team has strong scientific research ability and high academic level. The research method is feasible, and the research results have certain social value and practical significance. However, the project has the following shortcomings:</p> <p>1. The specific research methods and technical routes are not clearly described in the project ;</p> |   |                                                              |

|                                                                                                                                                                               |                                                                                                                                                                    |                                     |            |
|-------------------------------------------------------------------------------------------------------------------------------------------------------------------------------|--------------------------------------------------------------------------------------------------------------------------------------------------------------------|-------------------------------------|------------|
| 2. What is the relationship between the research content of this project and traditional Chinese medicine? What is the specific work of TCM researchers in the research team? |                                                                                                                                                                    |                                     |            |
| 17                                                                                                                                                                            | Recommendation                                                                                                                                                     | Accept proposal without revision    |            |
|                                                                                                                                                                               |                                                                                                                                                                    | Accept proposal with minor revision | Y          |
|                                                                                                                                                                               |                                                                                                                                                                    | Accept proposal with major revision |            |
|                                                                                                                                                                               |                                                                                                                                                                    | Reject proposal                     |            |
| 18                                                                                                                                                                            | Comments for improvement and revision or Reasons for rejection:<br>Please make a minor revision for the project to make the research more reasonable and specific. |                                     |            |
| 19                                                                                                                                                                            | If necessary, recommend a revised budget:                                                                                                                          |                                     |            |
|                                                                                                                                                                               |                                                                                                                                                                    | Year 1, RM                          | Year 2, RM |
|                                                                                                                                                                               | Allowance for assistant                                                                                                                                            |                                     |            |
|                                                                                                                                                                               | Travel and subsistence                                                                                                                                             |                                     |            |
|                                                                                                                                                                               | Equipment and accessories                                                                                                                                          |                                     |            |
|                                                                                                                                                                               | Research materials                                                                                                                                                 |                                     |            |
|                                                                                                                                                                               | Rental                                                                                                                                                             |                                     |            |
|                                                                                                                                                                               | Minor repair                                                                                                                                                       |                                     |            |
|                                                                                                                                                                               | Special service                                                                                                                                                    |                                     |            |
|                                                                                                                                                                               | <b>Total amount</b>                                                                                                                                                |                                     |            |
| 20                                                                                                                                                                            | Remuneration for XMUMRF Peer Review                                                                                                                                |                                     |            |
|                                                                                                                                                                               |                                                                                                                                                                    |                                     |            |
| 21                                                                                                                                                                            |                                                                                                                                                                    |                                     |            |

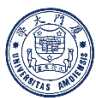

XIAMEN UNIVERSITY MALAYSIA

廈門大學 馬來西亞分校

## Xiamen University Malaysia Research Fund (XMUMRF) Evaluation Form

|             |      |              |   |
|-------------|------|--------------|---|
| <b>Year</b> | 2020 | <b>Cycle</b> | 6 |
|-------------|------|--------------|---|

|                                    |                                                                                                                   |
|------------------------------------|-------------------------------------------------------------------------------------------------------------------|
| Name of evaluator                  | _____                                                                                                             |
| Title/designation                  | _____                                                                                                             |
| Department/Faculty/University      | _____                                                                                                             |
| Home/Office address                | _____                                                                                                             |
| Mobile phone no                    | _____                                                                                                             |
| Email                              | _____                                                                                                             |
| Principal Investigator (PI)        | Muhammad Shahzad Aslam                                                                                            |
| Title of proposed research project | Development of Personalized Mobile Mental Health Intervention for Workplace Cyberbullying on Health practitioners |

| <b>Evaluation</b> |                                    |                                                                          |     |
|-------------------|------------------------------------|--------------------------------------------------------------------------|-----|
| 1                 | Research project team              |                                                                          | Y/N |
|                   | PI                                 | Appropriate qualifications to conduct and complete the proposed research | Y   |
|                   | Co-researchers (if applicable)     | Appropriate qualifications                                               | Y   |
| 2                 | Title of proposed research project | Appropriate for the proposed research activities, etc                    | Y   |
|                   |                                    | Not appropriate, too general, etc                                        |     |
| 3                 | Research area/field                | Appropriate or not                                                       | Y   |
| 4                 | Duration                           | Appropriate or not                                                       | Y   |
| 5                 | Abstract                           | Well written, informative, etc                                           | Y   |
|                   |                                    | Poor, recommend to rewrite, etc                                          |     |
| 6                 | Objective(s)                       | Clearly written, achievable, etc                                         | Y   |
|                   |                                    | Ambiguous, etc                                                           |     |
|                   |                                    | Too ambitious, etc                                                       |     |

|    |                                                                                                                                                                                                                                                                                                                                                                                                                                                                                                                                                                                                                                                                         |                                                                                                                                                                                                                                                                                                                                                                                                                                                                                     |   |                                        |
|----|-------------------------------------------------------------------------------------------------------------------------------------------------------------------------------------------------------------------------------------------------------------------------------------------------------------------------------------------------------------------------------------------------------------------------------------------------------------------------------------------------------------------------------------------------------------------------------------------------------------------------------------------------------------------------|-------------------------------------------------------------------------------------------------------------------------------------------------------------------------------------------------------------------------------------------------------------------------------------------------------------------------------------------------------------------------------------------------------------------------------------------------------------------------------------|---|----------------------------------------|
| 7  | Literature review/<br>Research background                                                                                                                                                                                                                                                                                                                                                                                                                                                                                                                                                                                                                               | Concise, acceptable with some relevant key references, etc                                                                                                                                                                                                                                                                                                                                                                                                                          | Y |                                        |
|    |                                                                                                                                                                                                                                                                                                                                                                                                                                                                                                                                                                                                                                                                         | Irrelevant, insufficient, etc                                                                                                                                                                                                                                                                                                                                                                                                                                                       |   |                                        |
| 8  | Research methodology                                                                                                                                                                                                                                                                                                                                                                                                                                                                                                                                                                                                                                                    | Good, using existing methods, etc                                                                                                                                                                                                                                                                                                                                                                                                                                                   | Y |                                        |
|    |                                                                                                                                                                                                                                                                                                                                                                                                                                                                                                                                                                                                                                                                         | Good, developing new methods, etc                                                                                                                                                                                                                                                                                                                                                                                                                                                   |   |                                        |
|    |                                                                                                                                                                                                                                                                                                                                                                                                                                                                                                                                                                                                                                                                         | Insufficient details, etc                                                                                                                                                                                                                                                                                                                                                                                                                                                           |   |                                        |
| 9  | Flowchart                                                                                                                                                                                                                                                                                                                                                                                                                                                                                                                                                                                                                                                               | Lucid, informative, etc                                                                                                                                                                                                                                                                                                                                                                                                                                                             | Y |                                        |
| 10 | Expected results or benefits                                                                                                                                                                                                                                                                                                                                                                                                                                                                                                                                                                                                                                            | Reasonable, achievable, etc                                                                                                                                                                                                                                                                                                                                                                                                                                                         | Y |                                        |
| 11 | Benefits of the proposed research to XMUM, the economy, and the society                                                                                                                                                                                                                                                                                                                                                                                                                                                                                                                                                                                                 | Reasonable, achievable, etc                                                                                                                                                                                                                                                                                                                                                                                                                                                         | Y |                                        |
| 12 | Comment on the status of similar or related research in Malaysia and abroad; how is the proposed research different from them                                                                                                                                                                                                                                                                                                                                                                                                                                                                                                                                           | Well written, informative, etc                                                                                                                                                                                                                                                                                                                                                                                                                                                      | N | The applicant didn't mention it at all |
| 13 | Project schedule/Gantt chart                                                                                                                                                                                                                                                                                                                                                                                                                                                                                                                                                                                                                                            | Reasonable, achievable, etc                                                                                                                                                                                                                                                                                                                                                                                                                                                         | Y |                                        |
| 14 | Project milestones                                                                                                                                                                                                                                                                                                                                                                                                                                                                                                                                                                                                                                                      | Lucid, achievable, etc                                                                                                                                                                                                                                                                                                                                                                                                                                                              | Y |                                        |
| 15 | Budget                                                                                                                                                                                                                                                                                                                                                                                                                                                                                                                                                                                                                                                                  |                                                                                                                                                                                                                                                                                                                                                                                                                                                                                     |   |                                        |
|    | Allowance for assistant                                                                                                                                                                                                                                                                                                                                                                                                                                                                                                                                                                                                                                                 | Reasonable, comply with Guidelines                                                                                                                                                                                                                                                                                                                                                                                                                                                  |   |                                        |
|    | Travel and subsistence                                                                                                                                                                                                                                                                                                                                                                                                                                                                                                                                                                                                                                                  | Reasonable, comply with Guidelines                                                                                                                                                                                                                                                                                                                                                                                                                                                  |   |                                        |
|    | Equipment and accessories                                                                                                                                                                                                                                                                                                                                                                                                                                                                                                                                                                                                                                               | Reasonable, comply with Guidelines                                                                                                                                                                                                                                                                                                                                                                                                                                                  |   |                                        |
|    | Research materials                                                                                                                                                                                                                                                                                                                                                                                                                                                                                                                                                                                                                                                      | Reasonable, comply with Guidelines                                                                                                                                                                                                                                                                                                                                                                                                                                                  | Y |                                        |
|    | Rental                                                                                                                                                                                                                                                                                                                                                                                                                                                                                                                                                                                                                                                                  | Reasonable, comply with Guidelines                                                                                                                                                                                                                                                                                                                                                                                                                                                  |   |                                        |
|    | Minor repair                                                                                                                                                                                                                                                                                                                                                                                                                                                                                                                                                                                                                                                            | Reasonable, comply with Guidelines                                                                                                                                                                                                                                                                                                                                                                                                                                                  |   |                                        |
|    | Special service                                                                                                                                                                                                                                                                                                                                                                                                                                                                                                                                                                                                                                                         | Reasonable, comply with Guidelines                                                                                                                                                                                                                                                                                                                                                                                                                                                  | Y |                                        |
| 16 | Overall assessment of the proposal<br><br>Please summarise here:<br>With the development of network communication technology and social platform, Workshop cyberbullying on health practitioners has emerged in endlessly all over the world, and gradually developed into a serious social problem. It is very necessary to develop personalized mobile mental health intervention for workplace cyberbullying on health practitioners. The purpose of the research is clear, the technical route and research steps are feasible, the expected research results have better practicability, but the foundation of preliminary work for the research is still lacking. | In terms of quality, novelty, significance, impact, objective, scope, problem statement, literature review, references, methodology, statistics, timeliness, milestone, deliverable, cost effectiveness, budget, flowchart, project risks (technical, budget, timeline), suitability or competence of the PI, etc (strong, sound, good, poor, high, low, medium, minor weakness, major weakness, scientifically or technically flawed, all or partial assessment criteria met, etc) |   |                                        |

|    |                                                                                                                                                                                                                                                                                                                           |                                     |                                     |
|----|---------------------------------------------------------------------------------------------------------------------------------------------------------------------------------------------------------------------------------------------------------------------------------------------------------------------------|-------------------------------------|-------------------------------------|
|    |                                                                                                                                                                                                                                                                                                                           |                                     |                                     |
| 17 | Recommendation                                                                                                                                                                                                                                                                                                            | Accept proposal without revision    | Y                                   |
|    |                                                                                                                                                                                                                                                                                                                           | Accept proposal with minor revision | Further evaluation needed: Yes / No |
|    |                                                                                                                                                                                                                                                                                                                           | Accept proposal with major revision |                                     |
|    |                                                                                                                                                                                                                                                                                                                           | Reject proposal                     |                                     |
| 18 | Comments for improvement and revision or Reasons for rejection:<br>Please comment more on the status of similar or related research of “Personalized Mobile Mental Health Intervention for Workplace Cyberbullying on Health practitioners “in Malaysia and abroad; and how is the proposed research different from them. |                                     |                                     |
| 19 | If necessary, recommend a revised budget:                                                                                                                                                                                                                                                                                 |                                     |                                     |
|    |                                                                                                                                                                                                                                                                                                                           | Year 1, RM                          | Year 2, RM                          |
|    | Allowance for assistant                                                                                                                                                                                                                                                                                                   |                                     |                                     |
|    | Travel and subsistence                                                                                                                                                                                                                                                                                                    |                                     |                                     |
|    | Equipment and accessories                                                                                                                                                                                                                                                                                                 |                                     |                                     |
|    | Research materials                                                                                                                                                                                                                                                                                                        |                                     |                                     |
|    | Rental                                                                                                                                                                                                                                                                                                                    |                                     |                                     |
|    | Minor repair                                                                                                                                                                                                                                                                                                              |                                     |                                     |
|    | Special service                                                                                                                                                                                                                                                                                                           |                                     |                                     |
|    | <b>Total amount</b>                                                                                                                                                                                                                                                                                                       |                                     |                                     |
| 20 | Remuneration for XMUMRF Peer Review                                                                                                                                                                                                                                                                                       |                                     |                                     |
|    | Bank name (include branch for countries outside Malaysia):                                                                                                                                                                                                                                                                |                                     |                                     |
|    | Bank address:                                                                                                                                                                                                                                                                                                             |                                     |                                     |
|    | Account number:                                                                                                                                                                                                                                                                                                           |                                     |                                     |
|    | Swift Code:                                                                                                                                                                                                                                                                                                               |                                     |                                     |
| 21 | Signature of evaluator:                                                                                                                                                                                                                                                                                                   |                                     |                                     |
|    | Date:                                                                                                                                                                                                                                                                                                                     |                                     |                                     |
|    |                                                                                                                                                                                                                                                                                                                           |                                     |                                     |
